# Supplementary material for: Anion dynamics and motional decoupling in a glycerol–choline chloride deep eutectic solvent studied by one- and two-dimensional 35Cl NMR
Source: Royal Society of Chemistry journal article supplement (doi:10.1039/d3cp03668e), 2023-01-01
Supplement: d3cp03668e1.pdf [file d3cp03668e1.pdf]

Supplementary Material regarding the article

## Anion dynamics and motional decoupling in a glycerol-choline chloride deep eutectic solvent studied by one- and two-dimensional $^{35}\text{Cl}$ NMR

Yannik Hinz, Joachim Beerwerth and Roland Böhmer  
*Fakultät Physik, Technische Universität Dortmund, D-44221 Dortmund, Germany*

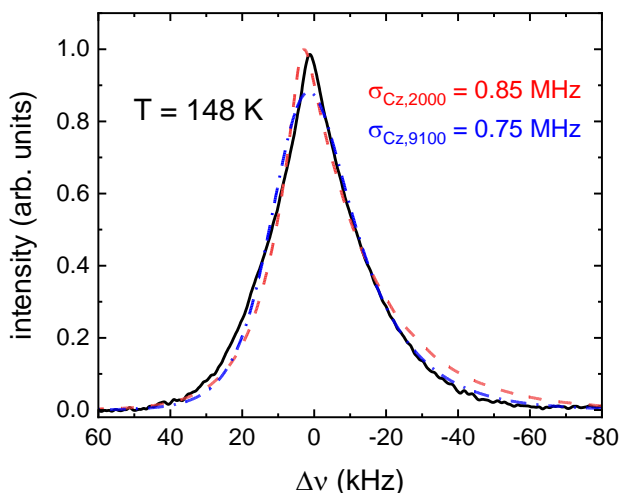

Fig. S1: Low-temperature spectrum measured for glyceline at 39.2 MHz (black solid line) with a Cjzek fit resulting in an apodization of 9.1 kHz (dash-dotted blue line) and a Cjzek fit (describing the central part better) using a fixed apodization of 2 kHz (dashed red line). The corresponding standard deviations  $\sigma_{Cz}$  are 0.75 and 0.85 MHz, respectively. The Cjzek fit with the apodization of 2 kHz is shown as dashed line in Figure 1 of the main article.

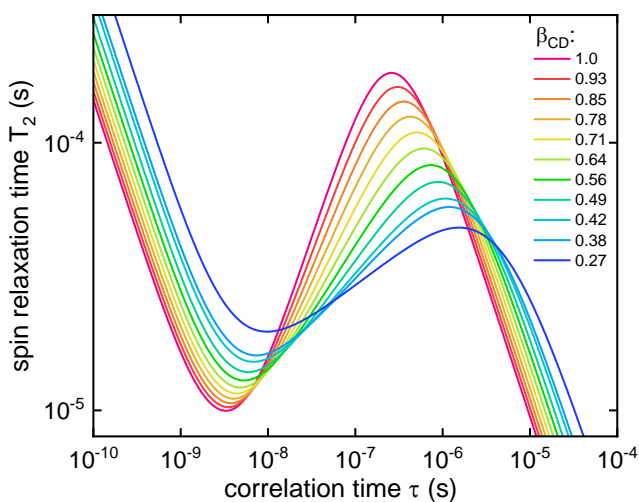

Fig. S2: For a range of Cole-Davidson parameters  $\beta_{CD}$ , this plot shows the correlation time dependence of  $T_{2c}$  as calculated according to eqn (8). This plot allows one to estimate the correlation time corresponding to the position of the local minimum and maximum of  $T_{2c}$  for a given  $\beta_{CD}$ . For the present analysis the curve for  $\beta_{CD} = 0.38$  is used.

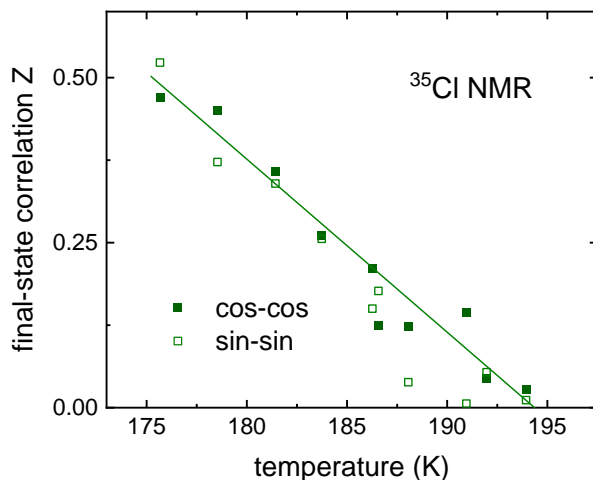

Fig. S3: Temperature dependent final-state correlation  $Z$  obtained from the analysis of the  $^{35}\text{Cl}$  stimulated-echo measurements of glycylglycine. The line is drawn to guide the eye.

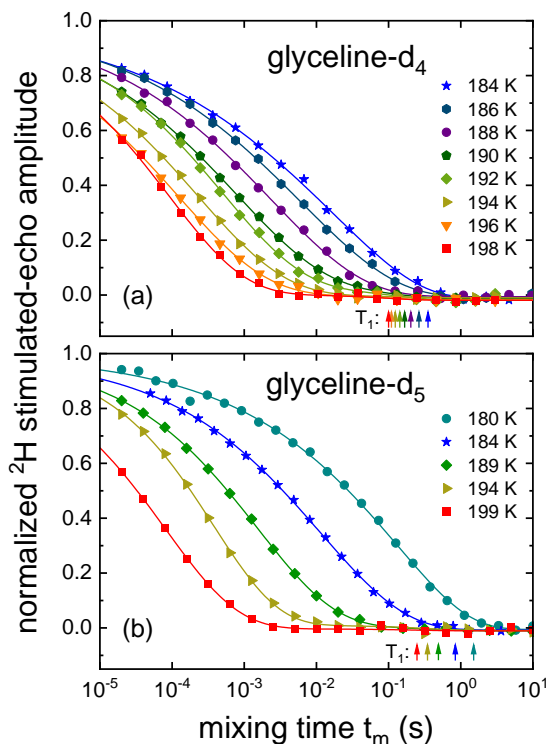

Fig. S4: Temperature dependent cos-cos  $^2\text{H}$  echo amplitudes measured for (a) glycylglycine- $\text{d}_4$  and (b) glycylglycine- $\text{d}_5$  at an evolution time of  $20\ \mu\text{s}$ . Analogous to Eq. (11), the lines are fits to the normalized echo amplitudes  $S_2(t_m) = F_2(t_m)M_z(t_m)$ . The arrows indicate the  $1/e$  decay times of the independently measured longitudinal magnetization recoveries. For glycylglycine- $\text{d}_4$  (deuterated at choline's alkyl chain) the average Kohlrausch exponent is  $\beta_{2,\text{ch}} = 0.34$ . For glycylglycine- $\text{d}_5$  (deuterated at glycerol's carbon atoms) the average Kohlrausch exponent is  $\beta_{2,\text{gly}} = 0.40$ .
